# Supplementary material
Source: PubMed Central journal article supplement (PMC6035283)
Supplement: mmc1.pdf [file mmc1.pdf]

**The American Journal of Human Genetics, Volume 103**

**Supplemental Data**

**Natural Selection Has Differentiated  
the Progesterone Receptor among Human Populations**

**Jingjing Li, Xiumei Hong, Sam Mesiano, Louis J. Muglia, Xiaobin Wang, Michael Snyder, David K. Stevenson, and Gary M. Shaw**

## SUPPLEMENTAL DATA

Supplemental data includes 8 figures and 4 tables

**Figure.S1 XP-EHH scan to detect positive selection in the *PGR* locus.** The peaks indicate signatures of positive selection leading to extreme extended haplotype homozygosity in one population but not the other. Comparisons were performed for CHB-CEU, CHB-YRI and CEU-YRI. Significance was empirically determined by the upper 5% XP-EHH scores across the entire genome for each comparison (the grey horizontal line). XL-EHH scores were computed at each individual SNP locus.

**Figure.S2 Nucleotide diversity in the *PGR* locus.** The *PGR* locus displayed increased nucleotide diversity in CEU, and reduced diversity in CHB. For each comparison, nucleotide diversity was compared between the *PGR* locus and the genome background.

**Figure.S3 EHH test on the *PGR* locus.** The EHH (extended haplotype homozygosity) test was performed on the *PGR* locus in CHB, CEU and YRI, where significant signals were only identified in CHB. Statistical significance was determined by the empirical P values across the genome in each population indicated by the dotted blue lines.

**Figure.S4 Gene expression of *PGR* across human tissue and cell types, determined by RNA-Seq from the GTEx Project.**

**Figure.S5. A significant correlation between the effect size on *PGR* ovary expression and population differentiation (*Fst* between CHB and CEU) for the HD-SNPs.** The SNP rs11224580 represents an exemplar site with a strong effect on modulating *PGR* in the ovary, and its high derived allele frequency is specific in CHB, but not in CEU and YRI.

**Figure.S6 Extreme haploinsufficiency of *PGR*.** The haploinsufficiency score of *PGR* accounts for the upper 3% across all the human genes. The predicted haploinsufficiency scores were from a previous study by Huang *et al.*

**Figure.S7 Distribution of *Fst* for the HD-SNPs.** The population differentiation, *Fst*, was computed between CHB and YRI. The bimodal distribution is evident, indicating the enrichment of both high-*Fst* ( $Fst \geq 0.5$ ) and low *Fst* ( $Fst \leq 0.1$ ) sites.

**Figure.S8 ATAC-Seq peaks in the ovary.** ATAC-Seq peaks indicate the location of potential regulatory elements in the ovary. ATAC-Seq peaks with intensity fold change greater than 2 over control was considered significant.

### Supplemental Tables (in separate spreadsheets)

**Table S1.** The *PGR* locus with high derived allele frequencies ( $\geq 0.7$ ) in CHB.

**Table S2.** The common SNPs for linkage disequilibrium analysis.

**Table S3.** The effect size of HD-SNPs on modulating *PGR* expression in the breast mammary tissue, uterus, vagina and ovary.

## Supplemental Figures

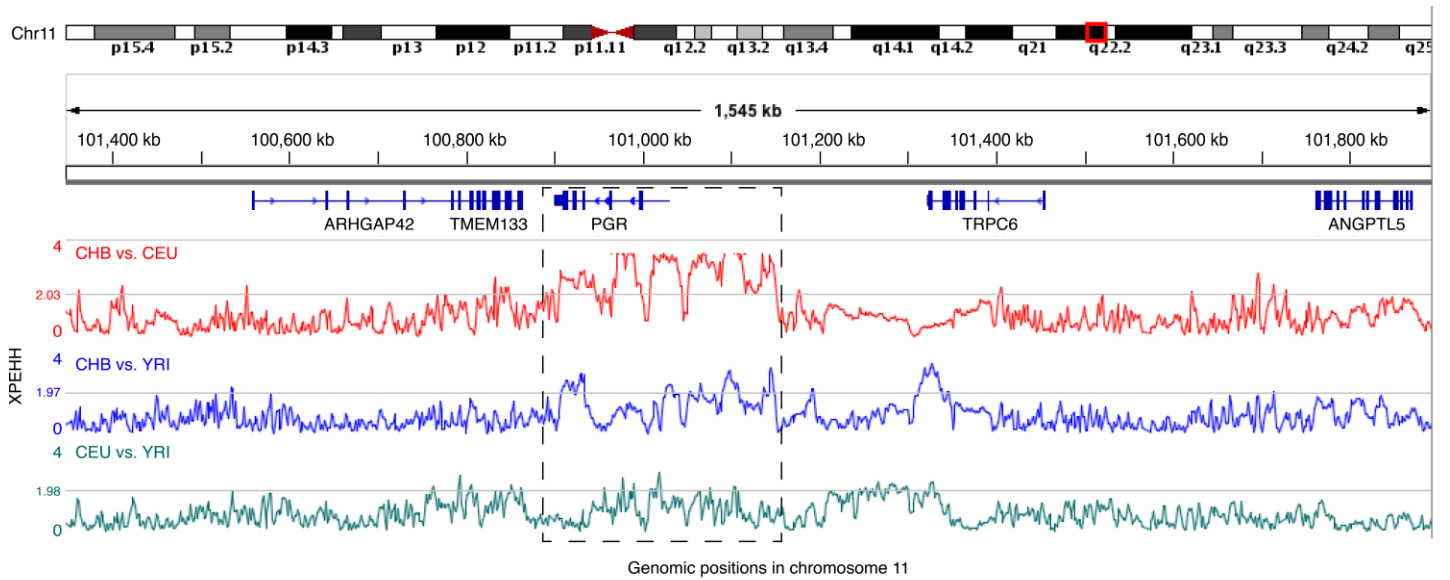

**Figure.S1 XP-EHH scan to detect positive selection in the *PGR* locus.** The peaks indicate signatures of positive selection leading to extreme extended haplotype homozygosity in one population but not the other. Comparisons were performed for CHB-CEU, CHB-YRI and CEU-YRI. Significance was empirically determined by the upper 5% XP-EHH scores across the entire genome for each comparison (the grey horizontal line). XP-EHH scores were computed at each individual SNP locus.

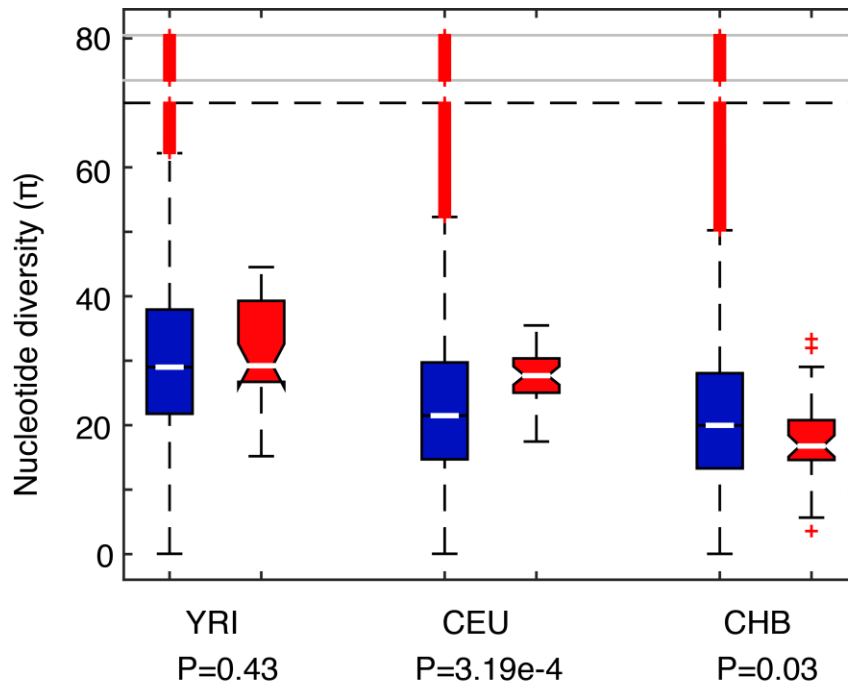

**Figure.S2 Nucleotide diversity in the *PGR* locus.** The *PGR* locus displayed increased nucleotide diversity in CEU, and reduced diversity in CHB. For each comparison, nucleotide diversity was compared between the *PGR* locus and the genome background.

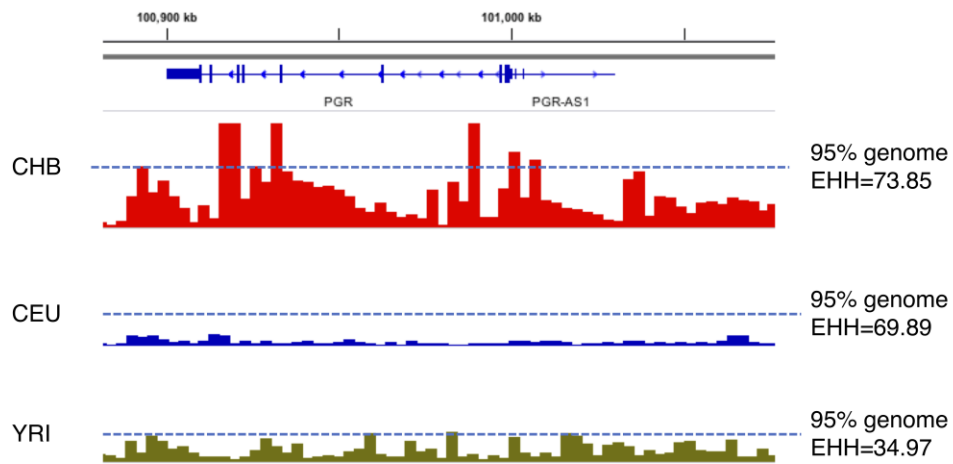

**Figure.S3 EHH test on the *PGR* locus.** The EHH (extended haplotype homozygosity) test was performed on the *PGR* locus in CHB, CEU and YRI, where significant signals were only identified in CHB. Statistical significance was determined by the empirical P values across the genome in each population indicated by the dotted blue lines.

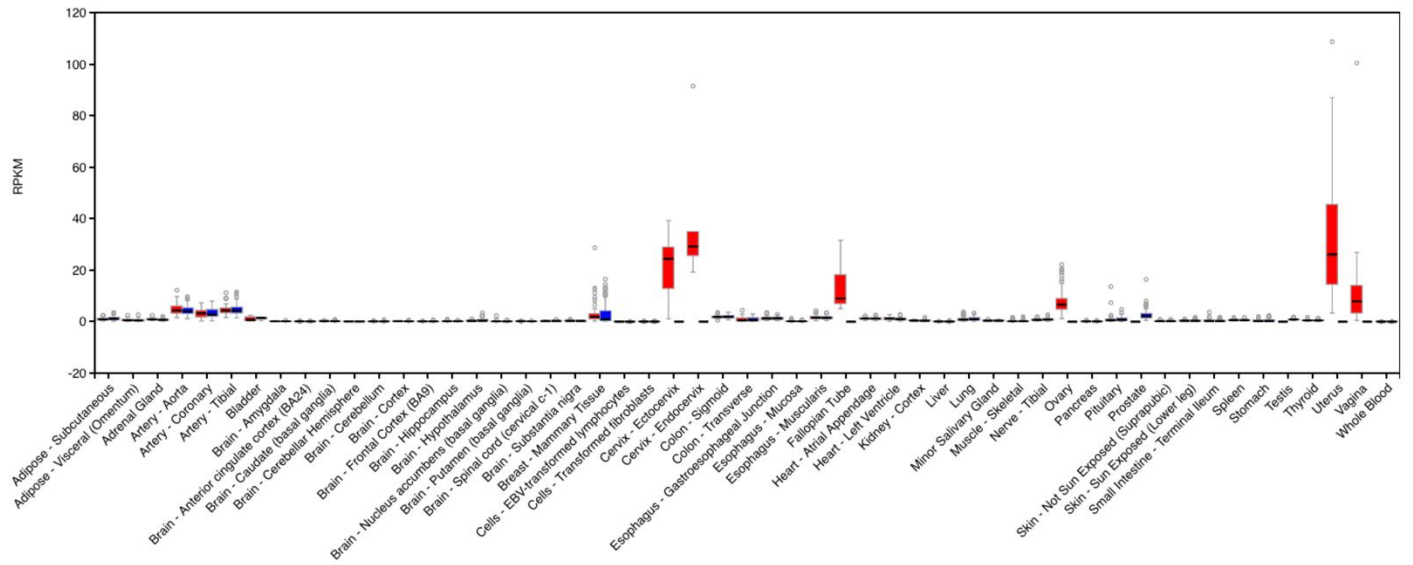

**Figure.S4 Gene expression of *PGR* across human tissue and cell types, determined by RNA-Seq from the GTEx Project.**

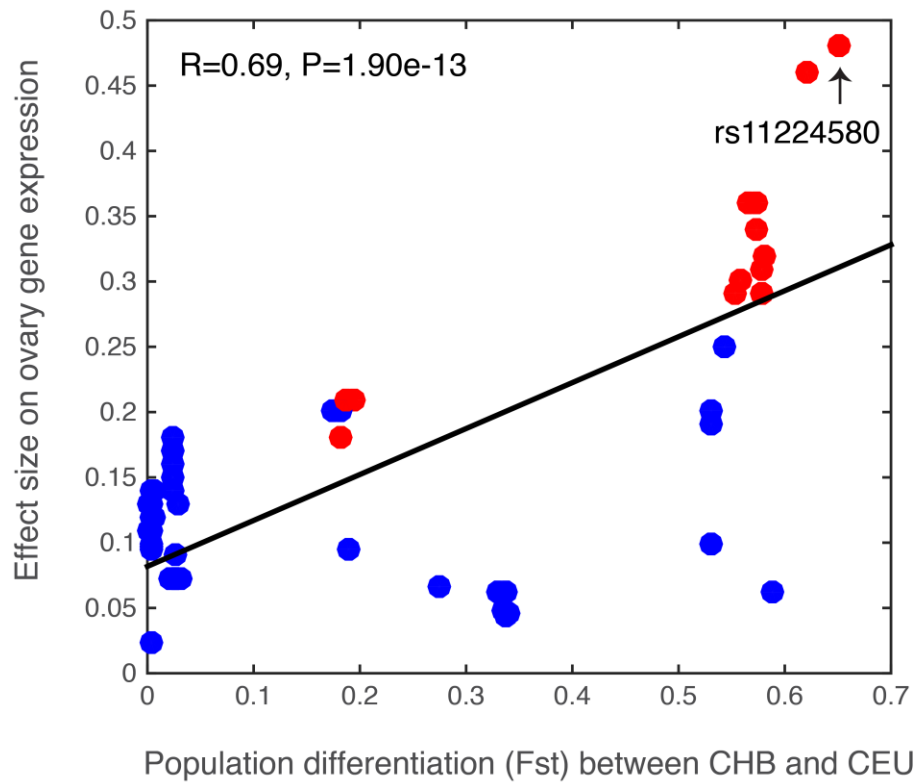

**Figure.S5. A significant correlation between the effect size on *PGR* ovary expression and population differentiation ( $F_{st}$  between CHB and CEU) for the HD-SNPs.** The SNP rs11224580 represents an exemplar site with a strong effect on modulating *PGR* in the ovary, and its high derived allele frequency is specific in CHB, but not in CEU and YRI.

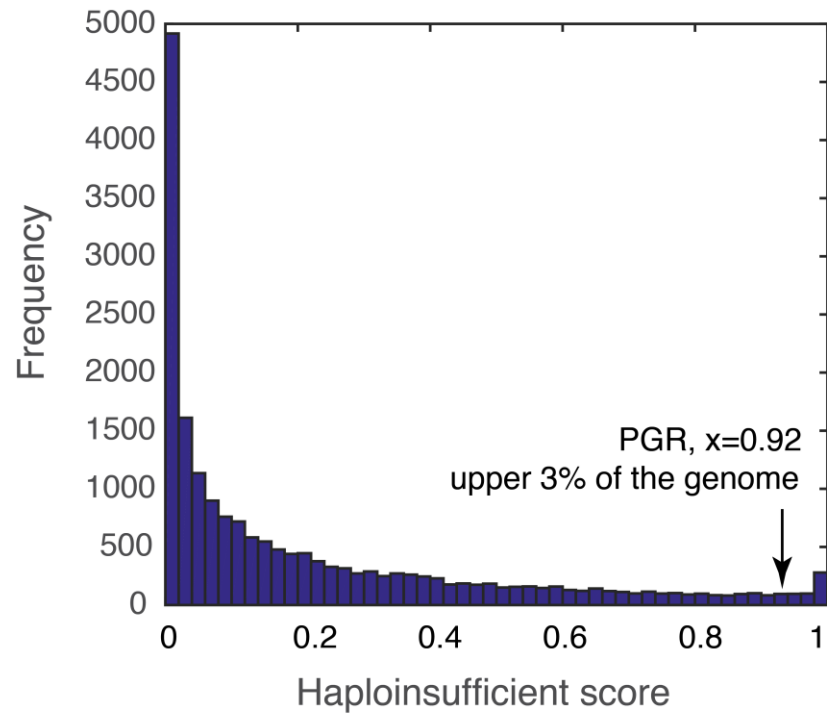

**Figure.S6 Extreme haploinsufficiency of *PGR*.** The haploinsufficiency score of *PGR* accounts for the upper 3% across all the human genes. The predicted haploinsufficiency scores were from a previous study by Huang *et al.*



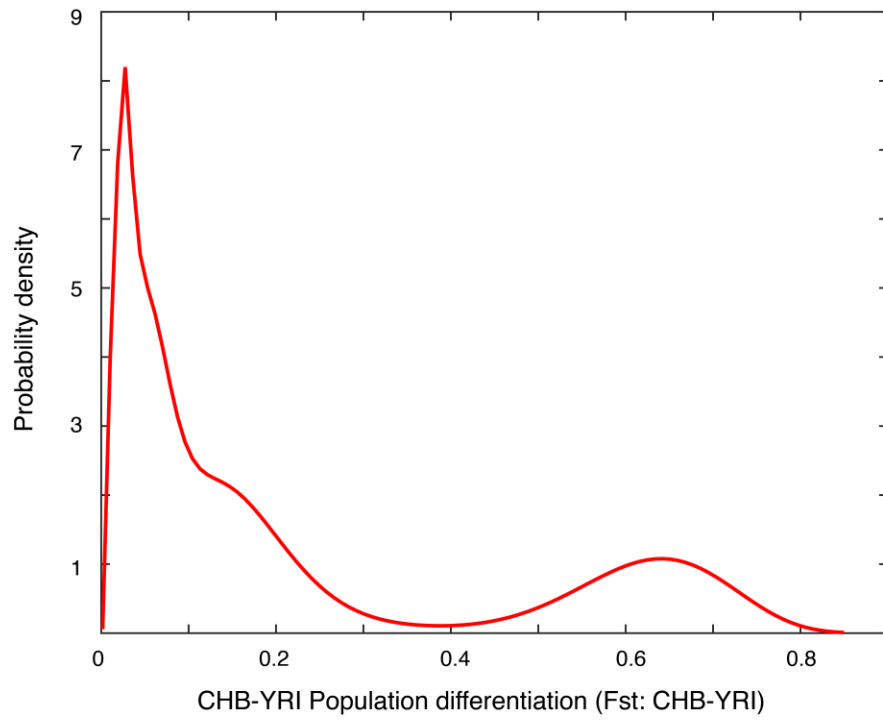

**Figure.S7 Distribution of  $F_{st}$  for the HD-SNPs.** The population differentiation,  $F_{st}$ , was computed between CHB and YRI. The bimodal distribution is evident, indicating the enrichment of both high- $F_{st}$  ( $F_{st} \geq 0.5$ ) and low  $F_{st}$  ( $F_{st} \leq 0.1$ ) sites.

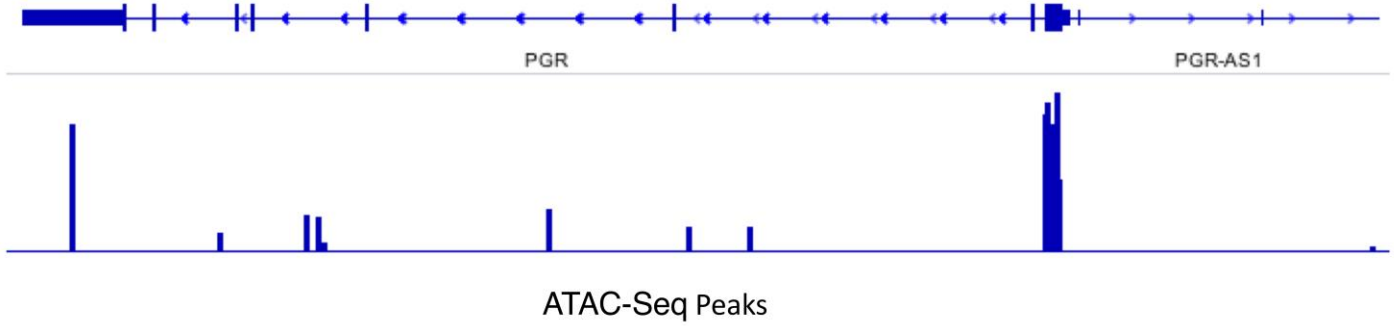

**Figure.S8 ATAC-Seq peaks in the ovary.** ATAC-Seq peaks indicate the location of potential regulatory elements in the ovary. ATAC-Seq peaks with intensity fold change greater than 2 over control was considered significant.
